# Supplementary material for: Maturation and detoxification of synphilin-1 inclusion bodies regulated by sphingolipids
Source: eLife journal article supplement (doi:10.7554/elife.92180), 2023-11-22

**Figure 5-figure supplement 1 A**

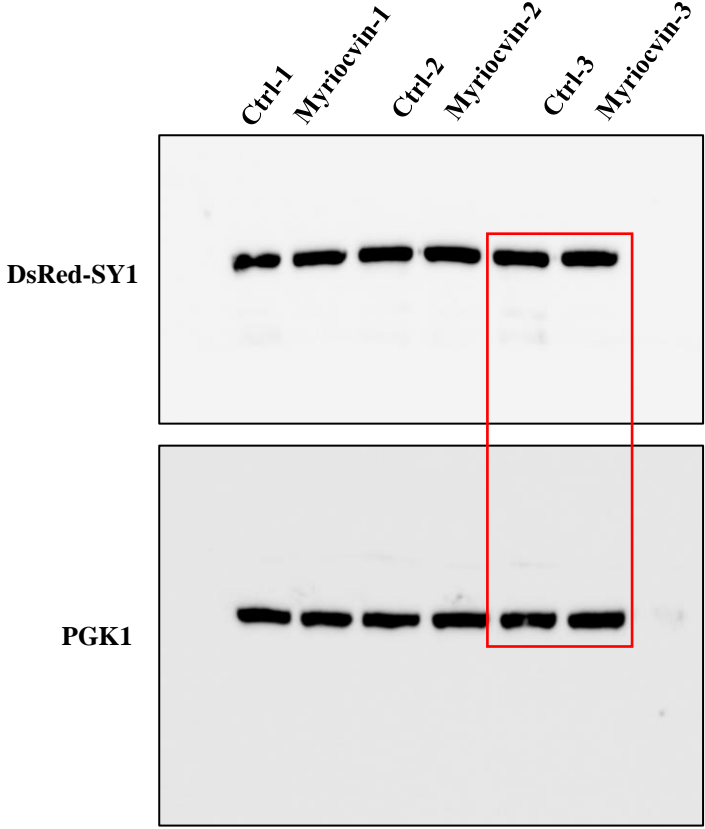

**Figure 5-figure supplement 1 B**

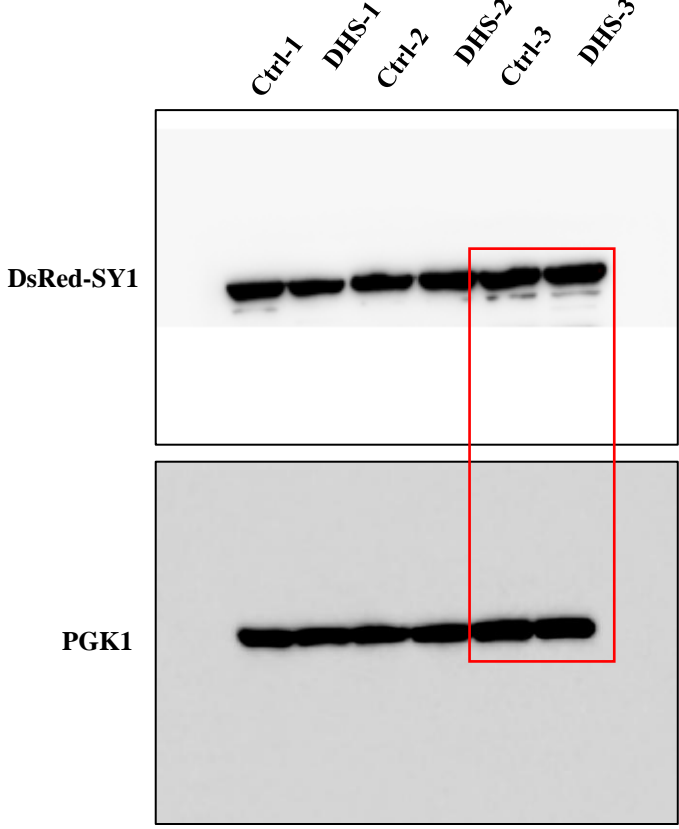

Supplement: fig5-figsupp1-data1 [file elife-92180-fig5-figsupp1-data1-v1.pdf]
