# Supplementary figures and images for: Maturation and detoxification of synphilin-1 inclusion bodies regulated by sphingolipids
Source: eLife journal article supplement (doi:10.7554/elife.92180), 2023-11-22

### Figure 6-figure supplement 3

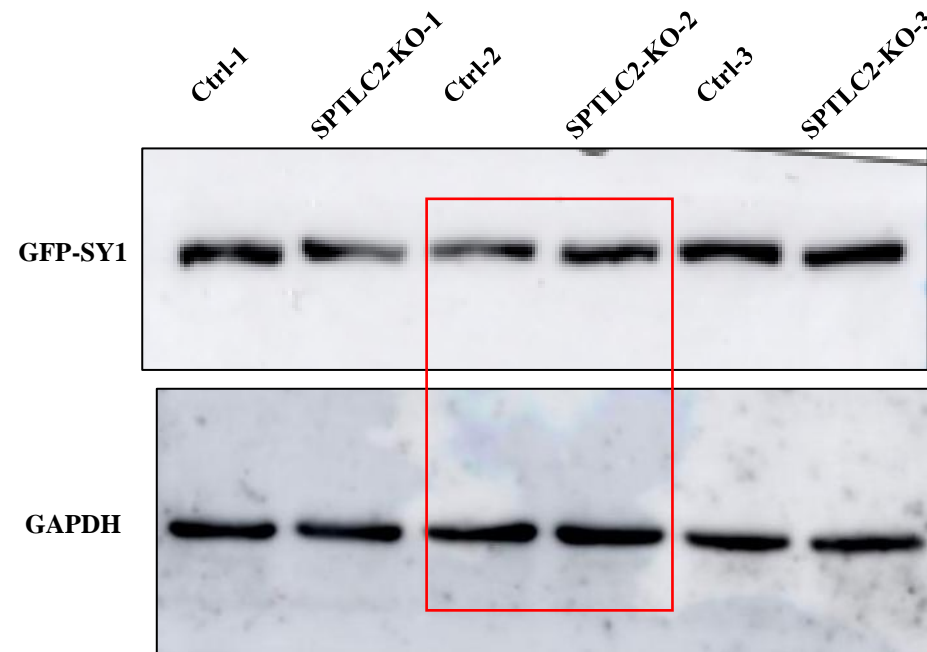

Supplement: fig6-figsupp3-data1 [file elife-92180-fig6-figsupp3-data1-v1.zip]
